1 **Latitude influences stability via stabilizing mechanisms in naturally-assembled**  
2 **forest ecosystems at different spatial grains**

3 Tianyang Zhou<sup>1,2,3</sup>, Dylan Craven<sup>4</sup>, Holger Kreft<sup>3,5</sup>, Jiaxin Zhang<sup>6</sup>, Xugao Wang<sup>7</sup>, Juyu  
4 Lian<sup>8</sup>, Wanhui Ye<sup>8</sup>, Guangze Jin<sup>9</sup>, Xiangcheng Mi<sup>10</sup>, Yujun Yao<sup>10</sup>, Haibao Ren<sup>10</sup>, Jie  
5 Yang<sup>11</sup>, Min Cao<sup>11</sup>, Congrong Wang<sup>1,2</sup>, Yuanzhi Qin<sup>1,2</sup>, Gang Zhou<sup>1,2</sup>, Yanan Fei<sup>1,2</sup>,  
6 Yaozhan Xu<sup>1</sup>, Xiujuan Qiao<sup>1,12\*</sup>, Mingxi Jiang<sup>1,12</sup> and Nathaly R. Guerrero-Ramírez<sup>3</sup>

7 <sup>1</sup>Key Laboratory of Aquatic Botany and Watershed Ecology, Wuhan Botanical Garden,  
8 Chinese Academy of Sciences, Wuhan, 430074, China

9 <sup>2</sup>University of Chinese Academy of Sciences, Beijing, 100049, China

10 <sup>3</sup>Biodiversity, Macroecology and Biogeography, Faculty of Forest Sciences and Forest  
11 Ecology, University of Göttingen, Göttingen, 37077, Germany

12 <sup>4</sup>Centro de Modelación y Monitoreo de Ecosistemas, Facultad de Ciencias, Universidad  
13 Mayor, Jose Toribio Medina 29, Santiago, Chile

14 <sup>5</sup>Centre of Biodiversity and Sustainable Land Use (CBL), University of Göttingen,  
15 Göttingen, 37077, Germany

16 <sup>6</sup>Lushan Botanical Garden, Jiangxi Province and Chinese Academy of Sciences,  
17 Jiujiang, 332900, China

18 <sup>7</sup>Institute of Applied Ecology, Chinese Academy of Sciences, Shenyang, 110016, China

19 <sup>8</sup>Key Laboratory of Vegetation Restoration and Management of Degraded Ecosystems,  
20 South China Botanical Garden, Chinese Academy of Sciences, Guangzhou 510650,  
21 China

22 <sup>9</sup>Center for Ecological Research, Northeast Forestry University, Harbin, 150040, China

23 <sup>10</sup>Zhejiang Qianjiangyuan Forest Biodiversity National Observation and Research  
24 Station, State Key Laboratory of Vegetation and Environmental Change, Institute of  
25 Botany, Chinese Academy of Sciences, Beijing, 100093

26 <sup>11</sup>CAS Key Laboratory of Tropical Forest Ecology, Xishuangbanna Tropical Botanical  
27 Garden, Chinese Academy of Sciences, Mengla, 666303, China

28 <sup>12</sup>Center of Conservation Biology, Core Botanical Gardens, Chinese Academy of  
29 Sciences, Wuhan, 430074, China

30

31 \*Corresponding author: Xiujuan Qiao

32 E-mail: xjqiao@wbcas.cn

33 **Abstract**

34 Ecosystem stability reveals how ecosystems respond to global change over time. Yet,  
35 the focus of past research on small spatial grains and extents overlooks scale  
36 dependence and how broad-scale environmental gradients shape stability. Here, we use  
37 forest inventory data covering a broad latitudinal gradient from the temperate to the  
38 tropical zone to examine cross-scale variation in stability of aboveground biomass and  
39 underlying stabilizing mechanisms. While stability did not shift systematically with  
40 latitude at either spatial grain, we found evidence that species asynchrony increased  
41 towards the tropics at the small spatial grain while species stability decreased at both  
42 spatial grains. Moreover, latitude stabilized forest communities *via* its effects on both  
43 stabilizing mechanisms, which compensated for the weak and destabilizing effects of  
44 species richness. Yet, the trade-off in the relative importance of species stability and  
45 species asynchrony for stability was not mediated by latitude, suggesting that context-  
46 dependent factors - to a greater extent than macroecological ones - underlie large-scale  
47 patterns of stability. Our results highlight the crucial role of species asynchrony and  
48 species stability in determining ecosystem stability across broad-scale environmental  
49 gradients, suggesting that conserving biodiversity alone may not be sufficient for  
50 stabilizing naturally-assembled forest ecosystems.

51  
52 **Keywords:** forest stability; latitudinal pattern; spatial scale; macroecological process;  
53 trade-off

54 **Introduction**

55

56 Given the evidence that diverse communities can buffer environmental fluctuation to a  
57 greater extent than less diverse communities<sup>1-4</sup> and thus stabilize ecosystem function  
58 over time (i.e., temporal stability or invariability), the diversity-stability relationship  
59 has been one of core research issues in ecology. The stabilizing effects of biodiversity  
60 on ecosystem functioning emerge largely due to two complementary, and not mutually  
61 exclusive, ecological mechanisms: species asynchrony and species stability<sup>5</sup>. Species  
62 asynchrony captures the heterogeneity in the response of co-occurring species to similar  
63 environmental conditions<sup>6,7</sup>, whereas species stability reflects the stabilizing effects of  
64 dominant species on temporal stability, whose impacts may – or may not – be mediated  
65 by biodiversity<sup>8-10</sup>. Yet, our understanding of diversity-stability relationships in  
66 naturally-assembled forest ecosystems comes mostly from studies with a limited  
67 geographic extent (i.e., the total area covered by all sampling units; but see: <sup>11,12</sup>) and  
68 small spatial grains (i.e., the spatial scale of sampling; average spatial grain (or plot  
69 size) = 0.04 ha<sup>13-15</sup>). This limits our understanding of how temporal stability and its  
70 drivers vary across both aspects of spatial scale, and it remains uncertain whether results  
71 from small spatial grains and extents can provide a robust theoretical basis for  
72 developing management policies that target large areas for forest conservation.

73 With increasing spatial grain, the range and heterogeneity in environmental conditions  
74 are expected to increase<sup>16</sup>, resulting in a strengthening of biodiversity-ecosystem  
75 functioning (BEF) and diversity-stability relationships. For instance, stronger positive  
76 biodiversity effects on ecosystem functioning are expected at larger spatial grains since  
77 higher environmental heterogeneity and a broader range of environmental conditions  
78 provide more opportunities for niche partitioning<sup>17</sup>. Yet, an analysis of 25 naturally-  
79 assembled forests<sup>18</sup> found that positive BEF relationships emerged mainly at the  
80 smallest spatial grain (0.04 ha), while BEF relationships shifted in direction to either  
81 neutral or negative at the largest spatial grain (1 ha). However, recent studies reported  
82 that biodiversity at large spatial grains could also enhance and stabilize ecosystem  
83 functions due to ‘macroecological complementarity’ effects, i.e. that diverse  
84 communities’ ability to buffer against environmental fluctuations should be more  
85 pronounced at larger spatial grains because more species with different ecological  
86 niches accumulate, or ‘spatial insurance’ effects, i.e. higher spatial turnover of  
87 biodiversity can stabilize regional community dynamics, implying that similar

88 ecological processes may occur at multiple spatial scales<sup>19–23</sup>. As such, whether the  
89 current understanding of stability from local spatial grains can predict stability patterns  
90 and underlying stabilizing mechanisms at larger spatial grains – and whether they  
91 generate emergent macroecological patterns – is unclear.

92 Macroecological patterns of stability and shifts in stabilizing mechanisms may emerge  
93 due to changes in species richness, tree community properties (i.e. functional  
94 composition and stand structure), and environmental conditions. For instance, due to  
95 the stabilizing effects of biodiversity, it is expected that stability will change with  
96 latitude as is typically the case for species richness, i.e., increasing from the poles  
97 towards the equator<sup>24</sup>. Additionally, because forests can be less even towards the  
98 equator<sup>25</sup>, ecosystem functioning at higher latitudes may be regulated more strongly by  
99 dominant species<sup>26,27</sup>. Consequently, the stabilizing effects of species stability may be  
100 stronger at higher latitudes, while species asynchrony may follow the inverse pattern.  
101 Beyond biotic factors, latitudinal variation in abiotic factors, such as climate, have been  
102 shown to explain not only ecosystem stability<sup>28,29</sup>, but also the diversity-stability  
103 relationship<sup>30,31</sup>. Variation in climate regulates the spatial pattern of functional  
104 composition<sup>32</sup>, thus influencing ecosystem functions (as predicted by the mass ratio  
105 hypothesis<sup>33</sup>), such that communities with high biomass stocks and stability are  
106 typically dominated by species with trait values associated with resource  
107 conservation<sup>33–36</sup>. Similarly, stem density also varies with climate<sup>12,13</sup>, and often reflects  
108 interactions among individuals within a community, which in turn could influence  
109 temporal stability. In areas with fertile soil and warm climate, competition could  
110 destabilize ecosystem functioning, while in areas with barren soil and cold climate  
111 facilitation could increase temporal stability<sup>13,37</sup>.

112 To elucidate large-scale patterns of temporal stability and underlying stabilizing  
113 mechanisms in naturally-assembled forests, we analyzed a comprehensive census of six  
114 plots covering a broad latitudinal gradient (21.61 °N - 47.18 °N) ranging from  
115 temperate to tropical forests in the Chinese Forest Biodiversity Monitoring Network  
116 over ten years (Fig. 1A). Our dataset contains more than 1,900,000 re-measurements  
117 over three censuses with 1,013 species from these six plots, whose area range from 9  
118 ha to 25 ha and are divided in quadrants of 0.4 ha (Table S1). To account for differences  
119 in plot size, we randomly selected 100 quadrant per plot (4.0 ha) 100 times (Fig S1).

120 We address the following questions: (1) How do stability and stabilizing mechanisms  
121 (i.e. species asynchrony and species stability) vary with latitude, and how do latitudinal  
122 patterns vary with spatial grain (0.4 ha and 4.0 ha)? (2) What are the principal drivers  
123 that underpin stability? (3) Is there a latitudinal trade-off between species stability and  
124 species asynchrony in driving ecosystem stability? We hypothesize (H1) that the  
125 latitudinal pattern of stability may be either positive, negative, or neutral (Fig. 1B) due  
126 to three different opposing mechanisms. A positive relationship may emerge given the  
127 potentially destabilizing effects of warmer climates, resulting in stability increasing  
128 with latitude<sup>28,29,38</sup>. A negative relationship may emerge if the stabilizing role of  
129 biodiversity is stronger than the destabilizing effects of climate, mirroring the  
130 latitudinal diversity gradient<sup>39</sup>, and resulting in stability decreasing with latitude; or  
131 there might not be a directional change in stability with latitude, as biodiversity and  
132 stability may be decoupled in naturally-assembled ecosystems<sup>36,40</sup>. We anticipate that  
133 species asynchrony and species stability will decrease and increase with latitude,  
134 respectively, and that their stabilizing effects will be stronger at the smaller spatial grain,  
135 with weak or neutral effects at the large grain (Fig. 1C). Second, we hypothesize (H2)  
136 that both biotic (species richness, species stability, species asynchrony, functional trait  
137 composition, and stem density) and abiotic factors (latitude, climate and soil nutrients),  
138 directly and indirectly, influence variation in temporal stability across the latitudinal  
139 gradient. Finally, while we expect (H3) that both species asynchrony and stability will  
140 jointly determine stability, we anticipate that their relative importance will exhibit a  
141 trade-off along the latitudinal gradient (Fig. 1D), with stability mainly being driven by  
142 species stability at higher latitudes and by species asynchrony at lower latitudes.

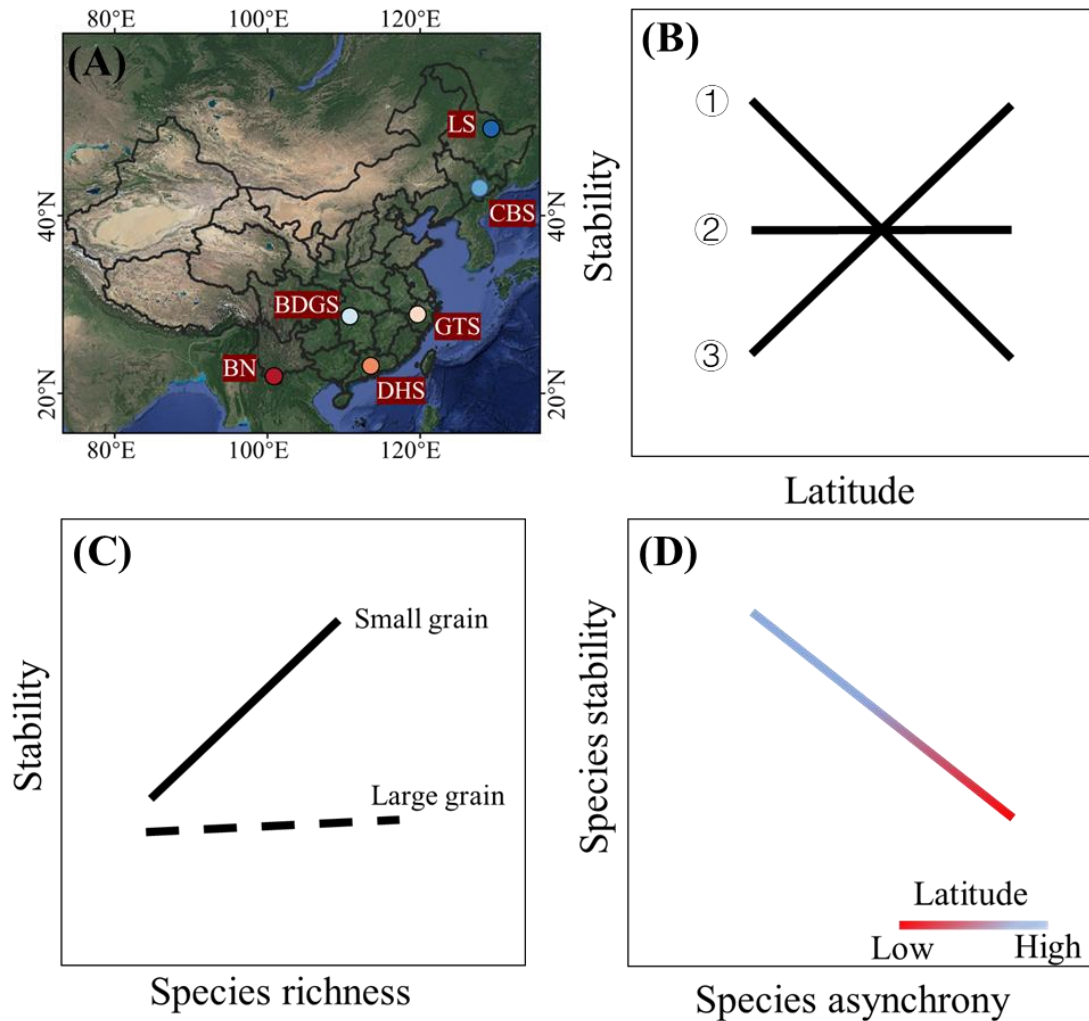

143  
144  
145  
146  
147  
148  
149  
150  
151  
152  
153  
154  
155  
156  
157  
158  
159  
160  
161  
162  
163  
164  
165

**Fig. 1 The latitudinal gradient used in this study to examine broad-scale patterns and the hypothesized patterns, drivers of ecosystem stability.** (A) The spatial distribution of six study sites belonging to three forest ecosystems across China (temperate forest: LS (Liangshui) and CBS (Changbaishan); subtropical forest: BDGS (Badagongshan), GTS (Gutianshan), and DHS (Dinghushan); tropical forest: BN (Banna), Table S1). (B) Hypothesized latitudinal patterns of stability. Given a stabilizing effect of biodiversity, we would expect that stability is higher at lower latitudes, and decreases with increasing latitude (1). However, biodiversity and stability could be decoupled in naturally-assembled ecosystems, resulting in a non-directional relationship between stability and latitude (2). Due to the destabilizing effects of warmer climates, stability also could decrease with latitudinal shifts in temperature (3). (C) Hypothesized relationships between species richness and stability at different spatial grains. The positive effects of species richness on stability at small spatial grain (0.04 ha) could weaken with spatial grain, possibly becoming neutral at the large spatial grain (4.0 ha). (D) The prediction that the relative importance of species stability and asynchrony for ecosystem stability in forest communities may vary across the latitudinal gradient. Species asynchrony could play a more important role in shaping the stability of tropical forests due to their higher biodiversity, while species stability could play a more significant role in determining the stability of temperate forests, which are frequently dominated by fewer species (i.e. they are less even) than tropical forests.

166 **Results**

167 **Latitudinal patterns in temporal stability and stabilizing mechanisms across**  
 168 **spatial grains**

169 Our results indicated that stability did not vary significantly with latitude at either  
 170 spatial grain (large grain:  $P = 0.08$ , small grain:  $P = 0.13$ , Fig. 2A, D). In contrast, we  
 171 found that species asynchrony significantly decreased with latitude at the small, but not  
 172 at the large spatial grain (large grain:  $P = 0.61$ ; small grain:  $R^2_m = 0.12$ ,  $P = 0.04$ , Fig.  
 173 2B, E) and that species stability significantly increased with latitude at both spatial  
 174 grains (large grain:  $R^2_m = 0.78$ ,  $P < 0.01$ ; small grain:  $R^2_m = 0.27$ ,  $P < 0.01$ , Fig. 2C,  
 175 F).

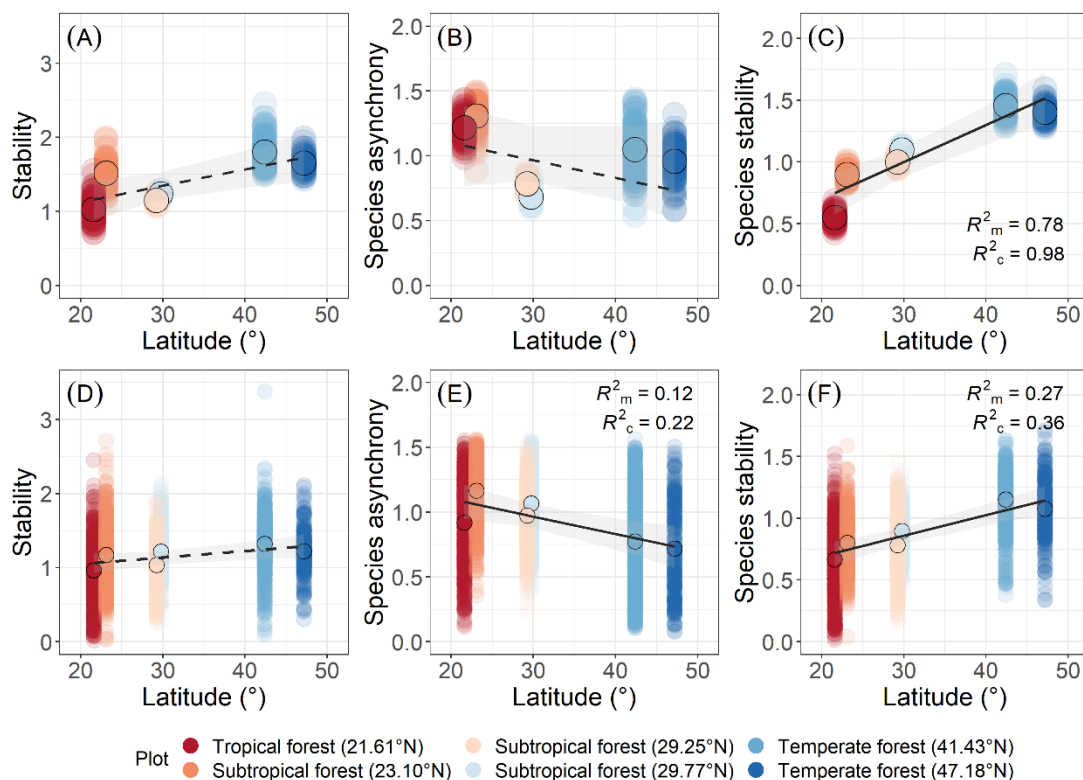

176  
 177  
 178  
 179  
 180  
 181  
 182  
 183  
 184  
 185  
 186

**Fig. 2** Latitudinal patterns of stability (A, D), species asynchrony (B, E) and species stability (C, F) at two spatial grains (4.0 ha ( $n = 600$ ) and 0.4 ha ( $n = 3075$ )). Lines are mixed-effects model fits (solid lines:  $P < 0.05$ ; dashed line:  $P > 0.05$ ). Translucent points are plot-level values, while opaque points with black circles are mean values for each of the six study sites. Different colors indicate different study sites.  $R^2_m$  and  $R^2_c$  represent variation explained by fixed effects and the combination of fixed and random effects in mixed-effects models, respectively. Grey bands represent 95% confidence intervals. Both stability and species stability were log10 transformed, and species asynchrony was angular transformed.

187 Our results showed that species richness destabilized forest communities at both spatial  
 188 grains (large grain:  $R^2_m = 0.53$ ; small grain:  $R^2_m = 0.03$ ; Fig. 3A, D; Table S7), while  
 189 species asynchrony (large grain:  $R^2_m = 0.30$ ; small grain:  $R^2_m = 0.32$ ; Fig. 3B, E) and  
 190 species stability stabilized forest communities at both spatial grains (large grain:  $R^2_m =$   
 191  $0.67$ ; small grain:  $R^2_m = 0.45$ ; Fig. 3C, F; Table S7).

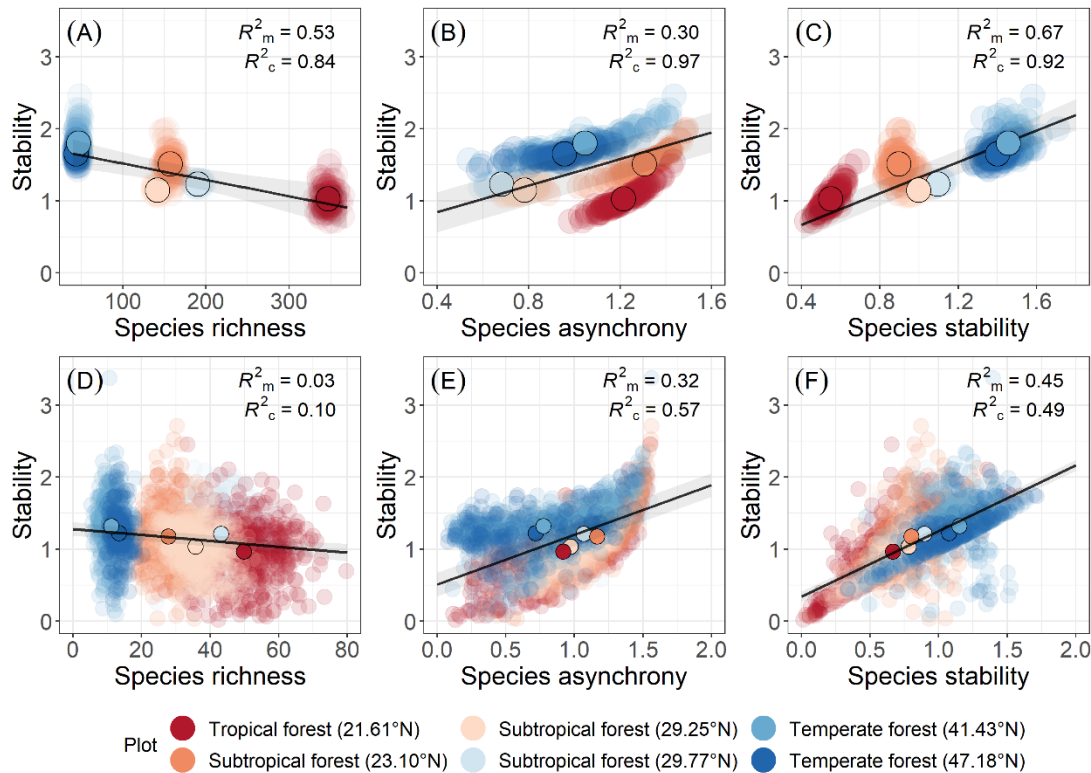

192 **Fig. 3 Relationships between species richness (A, D), species asynchrony (B, E),**  
 193 **species stability (C, F) and stability at two spatial grains (4.0 ha (n = 600) and 0.4**  
 194 **ha (n = 3075)).** Lines are mixed-effects model fits. Translucent points are plot-level  
 195 values, while opaque points with black circles are mean values for each study site.  
 196 Different colors indicate different study sites.  $R^2_m$  and  $R^2_c$  refer to the marginal and  
 197 conditional  $R^2$ , which represent variation explained by fixed effects and the  
 198 combination of fixed and random effects in mixed-effects models, respectively. Light  
 199 grey bands represent 95% confidence intervals. Both stability and species stability were  
 200 log10 transformed, and species asynchrony was angular transformed.  
 201  
 202

### 203 Drivers of stability across a latitudinal gradient

204 A piecewise structural equation model explained 78% of the variation in stability  
 205 (Fisher's  $s = 8.24$ ,  $P = 0.61$ ,  $AICc = 98.24$ ; Fig. 4, Table S8), with species stability and  
 206 species asynchrony being the main drivers of stability at the small grain (standardized  
 207 path coefficients = 0.72 and 0.65, respectively). Latitude and soil nutrients influenced  
 208 stability indirectly. Specifically, latitude increased stability *via*  $CWM_{SLA}$ , species



209 stability, and species richness (total effect: 0.44, Fig. 4); with  $CWM_{SLA}$  affecting  
 210 stability *via* a negative effect on species stability (standardized path coefficient = -0.14)  
 211 and stem density *via* a positive effect on species richness (standardized path coefficient  
 212 = -0.04). Forests with lower soil total nitrogen and soil organic carbon increased  
 213 stability *via*  $CWM_{SLA}$ , species stability and stem density (total effect: 0.12, Fig. 4).  
 214 Negative effects of species richness on stability were both direct (standardized path  
 215 coefficient = -0.05) and indirect, which operated *via* species stability (standardized path  
 216 coefficients = -0.17; Fig. 4). In contrast, species richness increased stability *via* species  
 217 asynchrony (standardized path coefficients = 0.08; Fig. 4).

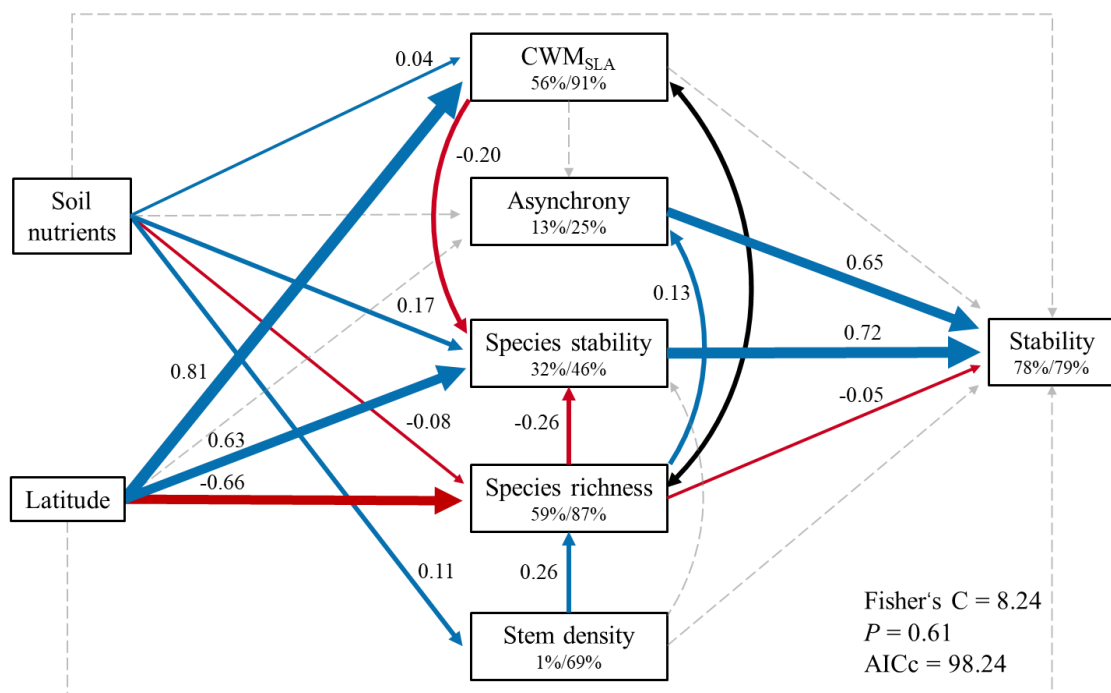

218  
 219  
 220  
 221  
 222  
 223  
 224  
 225  
 226  
 227  
 228  
 229  
 230  
 231  
 232  
 233  
 234  
 235

**Fig. 4 Direct and indirect effects of biotic and abiotic factors on stability across a latitudinal gradient at the small spatial grain.** The structural equation model includes soil nutrients (the first principal axis, positive values associated with lower total nitrogen and soil organic carbon), latitude (Latitude), functional trait composition (represented by the community-weighted mean of specific leaf area,  $CWM_{SLA}$ ), species asynchrony (Asynchrony), species stability (Species stability), species richness (Species richness), stem density (Stem density) and stability (Stability). The data fit the model well (Fisher's C = 8.24, P = 0.61; AICc = 98.24). Arrows represent causal relationships between variables. Black bi-directional arrows refer to significant partial pairwise correlations. Solid blue and red lines represent significant ( $P \leq 0.05$ ) positive and negative standardized paths, respectively. Gray dashed lines represent non-significant paths ( $P > 0.05$ ). Standardized path coefficients are represented for each statistically significant path, and path widths are scaled by standardized path coefficients. Numbers within boxes indicate the variance explained by fixed (left, marginal  $R^2$ ) and the combination of fixed and random effects (right, conditional  $R^2$ ).

## 236 Trade-off between species stability and asynchrony in driving stability

237 We observed a trade-off between the relative importance of species stability and species  
238 asynchrony in determining stability (slope = -1.27,  $P = 0.002$ ,  $R^2 = 0.91$ , Fig. 5).  
239 However, this trade-off was not related to latitude. Specifically, there were no  
240 significant relationships between latitude and the stabilizing effect of species  
241 asynchrony and species stability, and their ratio ( $P$  value were 0.45, 0.34 and 0.40,  
242 respectively. Fig. S6).

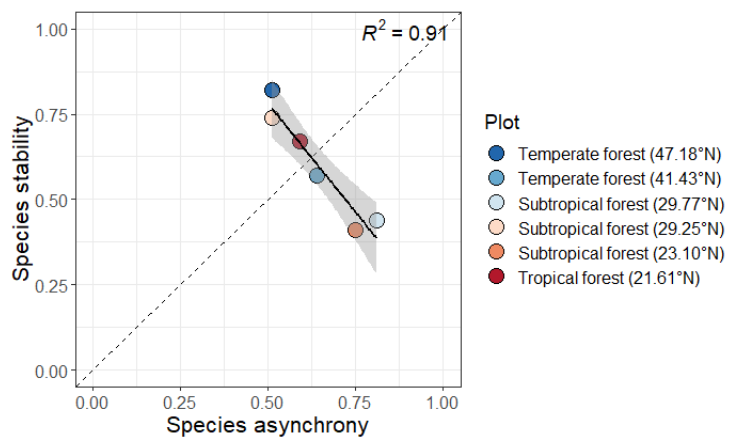

243 **Fig. 5 The relative importance of species stability and species asynchrony for**  
244 **stability across a latitudinal gradient.** The black line is a linear model fit ( $P < 0.05$ )  
245 for the relationship between the relative importance of both biotic stabilizing  
246 mechanisms in determining stability. Each point refers to the direct effect of species  
247 stability and asynchrony on stability for each study site.  
248  
249

## 250 Discussion

251 In naturally-assembled forest ecosystems, stability and its underlying mechanisms vary  
252 in response to biotic and abiotic factors<sup>12,14,15</sup>, yet it remains uncertain to what extent  
253 these factors shape emergent macroecological patterns of stability across spatial scales.  
254 Here, we provide unique insights by demonstrating that there is no clear latitudinal  
255 pattern of stability at either small or large spatial grains. Yet, we found that latitude  
256 influenced stability *via* biotic stabilizing mechanisms, primarily species stability and  
257 species asynchrony, at both spatial grains. Our study therefore reveals consistent  
258 positive effects of species stability on stability across spatial grains. The trade-off  
259 between species asynchrony and species stability in driving stability did not follow a  
260 latitudinal pattern, suggesting that context-dependent factors - to a greater extent than  
261 macroecological ones - underlie large-scale patterns of stability in naturally-assembled

262 forests.

263 Although there was not a clear latitudinal pattern of stability, we found that latitude  
264 influences stability *via* biotic stabilizing mechanisms. Latitudinal patterns of species  
265 asynchrony and species stability may arise from latitudinal variation in climate and  
266 systematic shifts in the importance of abundant and rare species for stability. Warm  
267 regions typically hold more species that differ in their response to environmental  
268 conditions<sup>41,42</sup>, resulting in higher species asynchrony at lower latitudes as observed in  
269 this study. Conversely, the increase in environmental stress (i.e., low temperature) with  
270 latitude may lead to a convergence of species responses to the environment, which  
271 lowered species asynchrony<sup>43</sup>. One possible explanation for the latitudinal shift in  
272 species asynchrony is that it is driven by underlying gradients in species diversity, as  
273 suggested by theory that diversity enhance species asynchrony<sup>5,7</sup>, and as observed in  
274 this study (Fig. 4). While theory suggests that species asynchrony should increase with  
275 spatial grain and extent<sup>16,22</sup>, as both factors are associated with larger species pools, we  
276 found that the latitudinal pattern of species asynchrony was weaker at the large spatial  
277 grain. For the latitudinal pattern of species stability, shifts in the ecological roles of  
278 abundance and rare species may be the primary reason<sup>5</sup>. Our results suggest that the  
279 impacts of dominant and rare species on stability change with latitude: while dominant  
280 species exhibit strong impacts on stability at higher latitudes with lower community  
281 evenness, rare species appear to have stronger impacts on stability at lower latitudes  
282 with higher community evenness<sup>5,44</sup>. Furthermore, the contrasting latitudinal patterns  
283 for species stability and species richness support growing evidence that species richness  
284 has a significantly negative effect on species stability<sup>9,40,44</sup>.

285 Overall, species richness had neutral or negative effects on stability. This finding  
286 suggests that other factors, e.g. climate change, affect biodiversity and stability  
287 simultaneously, implying correlation and not causality<sup>28,45</sup>. For example, warming can  
288 reduce stability but increase biodiversity, which may result in a neutral or even negative  
289 relationship between biodiversity and stability<sup>38,45</sup>. At small spatial grain, , our results  
290 support the idea that the impacts of species richness on stability are highly context-  
291 dependent in naturally-assembled ecosystems<sup>28,40</sup>. On the one hand, species-rich  
292 communities increase the likelihood that asynchronous responses among species to  
293 environmental conditions increase stability<sup>15,36</sup>. On the other hand, higher functional

294 redundancy in species-rich communities may enhance competition, thereby decreasing  
295 stability<sup>28,46</sup>. Therefore, the balance between the diversity of ecological strategies and  
296 their redundancy may shape the overall effect of species richness on stability in  
297 naturally-assembled forests. At the large spatial grain, the negative effects of species  
298 richness on stability are inconsistent with patterns found in grasslands<sup>47</sup>. The  
299 destabilizing effects of species richness we observe adds to the growing empirical  
300 evidence<sup>18</sup> that the expected positive effects of macroecological complementarity on  
301 ecosystem functioning may not manifest at "small" spatial grains (< 10 ha), a scale at  
302 which demographic stochasticity may overwhelm spatial insurance effects<sup>48</sup>.

303

304 The trade-off between species stability and asynchrony in driving stability was not  
305 driven by latitude, suggesting that the relative importance of different stabilizing  
306 mechanisms is not determined uniquely by macroecological drivers. Biotic and abiotic  
307 factors operating at smaller spatial scales may shape the relative importance of  
308 stabilizing mechanisms. For instance, García-Palacios et al.<sup>30</sup> found that diversity-  
309 stability is mediated by climate and soil nutrients, which were equally as important in  
310 stabilizing ecosystem functioning as biotic factors. We found that soil nutrients  
311 influenced stability *via* species stability, CWM<sub>SLA</sub>, species richness, and stem density.  
312 Soils associated with lower soil organic carbon (SOC), total nitrogen (TN), available  
313 phosphorus (AP) and pH had, overall, higher species stability, CWM<sub>SLA</sub>, and stem  
314 density, but lower species richness. Yet, when zooming in, the relative importance of  
315 soil nutrients on stabilizing mechanisms fluctuated inconsistently across the latitudinal  
316 gradient (Supplementary results), likely influencing the overall observed trade-off in  
317 the relative importance of species stability and species asynchrony. Therefore,  
318 understanding the trade-off between stabilizing mechanisms requires not only the  
319 integration of climatic factors and species richness, but also other abiotic conditions  
320 and biotic dimensions that operate at different ecological scales<sup>49</sup>.

321 In conclusion, our study provides fundamental empirical evidence that latitude  
322 influences stability in naturally-assembled forest ecosystems *via* stabilizing biotic  
323 mechanisms. Furthermore, we show that results from small spatial grains can provide  
324 valuable insights for understanding stability and underlying stabilizing mechanisms at  
325 spatial extents that are relevant for conservation and forest management. Moreover, our

326 results suggest that ecological processes that alter the functional composition and stem  
327 density, like secondary succession, anthropogenic disturbance, or forest management  
328 may also play a key role in driving nature's contributions to people over time.

329

## 330 **Methods**

331

### 332 **Study sites and data collection**

333 The dataset used in this study was compiled from CForBio Network  
334 (<http://www.cfbiodiv.cn>), which contains six forest dynamic plots, belonging to three  
335 forest ecosystems (temperate forest: LS, CBS; subtropical forest: BDGS, GTS, DHS;  
336 tropical forest: BN), whose area ranged from 9 ha to 25 ha (Fig. 1A; Table S1) and that  
337 are located across a latitudinal gradient (spanning from 21.61 °N to 47.18 °N). Each  
338 plot is divided into subplots (20 m × 20 m = 0.04 ha). Within each plot, all woody plants  
339 with diameter at 1.3 m height  $\geq$  1 cm were measured, mapped, identified, and tagged<sup>50</sup>.  
340 All the plots are resurveyed every five years. Our dataset included three inventories for  
341 each plot over a period of ten years, yielding a total of more than 1.9 million  
342 measurements with 1,013 species.

343

### 344 **Data compilation at the large spatial grain**

345 To explore the variance in the latitudinal pattern of stability and its stabilizing  
346 mechanisms among different spatial grains, we compiled a new dataset at the same  
347 spatial grain for all study sites (200 m × 200 m = 4.0 ha) including species richness,  
348 species asynchrony, species stability and stability, to minimize scale-dependent biases.  
349 To this end, we randomly selected 100 subplots with replacement to create an  
350 aggregated community. We then calculated species richness, species asynchrony,  
351 species stability, and temporal stability (see next section for details). We repeated this  
352 process 100 times to obtain a new dataset for each study site (Fig. S1). We also  
353 calculated species richness, species asynchrony, species stability and stability using  
354 data from all subplots for each plot. From hereon, we refer to results and analyses at the  
355 subplot level as the small spatial grain (0.04 ha) and those at the plot level as the large  
356 spatial grain (4.0 ha).

357

### 358 **Biotic factors and stability**

359 For each spatial grain at all study sites, we calculated species richness (SR), as the

360 number of living tree species per plot. We then averaged species richness across  
361 inventories. Stem density of living trees was also counted and averaged at small spatial  
362 grain.

363 To test the mass ratio hypothesis, we calculated the community-weighted means  
364 (CWMs) of functional traits at the small spatial grain using the relative abundance of  
365 each species. SLA (specific leaf area, cm<sup>2</sup>/g) was selected to reflect the “fast-slow”  
366 strategy of trees<sup>51</sup>, which we calculated with the following formula:

367

$$368 \quad CWM = \sum_{i=1}^n p_i t_i,$$

369

370 where  $p_i$  is the relative abundance of species  $i$  in a subplot with  $n$  species,  $t_i$  is the mean  
371 of SLA at species level for species  $i$ . SLA of each species was measured by the ratio of  
372 leaf area by leaf dry mass.

373

374 Species asynchrony at both spatial grains was calculated following ref<sup>6</sup>:

$$375 \quad \text{Species asynchrony} = 1 - \frac{\sigma^2}{(\sum_{i=1}^N \sigma_i)^2}$$

376 where  $\sigma$  is the standard deviation of aboveground biomass (AGB) across three  
377 inventories, and  $\sigma_i$  is the standard deviation of AGB of species  $i$  in each grain with  $N$   
378 species across the three inventories. A community is perfectly synchronous when the  
379 value is equal to 0, and is perfectly asynchronous when the value is equal to 1 (ref<sup>6</sup>).

380 Then, species stability at both spatial grains, i.e., the species level stability weighted by  
381 species' relative abundances, was calculated following ref<sup>5</sup>:

$$382 \quad \text{Species stability} = 1 / \sum_{i=1}^N \frac{\mu_i \sigma_i}{\mu \mu_i},$$

383 where  $\mu$  and  $\mu_i$  are the mean of AGB of grain and species  $i$  within this grain across the  
384 three inventories, respectively.

385

386 Temporal stability of aboveground biomass (AGB) at both spatial grains was defined  
387 as the ratio of mean ( $\mu$ ) AGB across three surveys to the standard deviation ( $\sigma$ ) of  
388 AGB<sup>52</sup>. To estimate the aboveground biomass of each individual, we used site- and  
389 species-specific allometric equations (see references in Table S2). We then summed  
390 aboveground biomass for each inventory.

391

392 **Climate and soil nutrients**

393 We obtained monthly temperature, precipitation, and potential evapotranspiration data  
394 for each study site from the National Earth System Science Data Center  
395 ([www.geodata.cn](http://www.geodata.cn)) with a spatial resolution of 1000 m × 1000 m. Given the lag effect  
396 of trees' response to climate, we used climate data for 13 years, including three years  
397 before the first inventory at each study site. For all study sites, we calculated mean  
398 annual temperature (MAT, °C), mean annual precipitation (MAP, mm<sup>-1</sup> y<sup>-1</sup>), and mean  
399 annual potential evapotranspiration (PET, mm<sup>-1</sup> y). We also calculated the standard  
400 deviation (SD) of MAT, MAP, and PET (Table S3). In addition, we also collected soil  
401 nutrient data including soil organic carbon (SOC, g/kg), total nitrogen (TN, mg/g),  
402 available phosphorus (AP, mg/kg) and pH within each subplot (Table S3).

403

404 We performed principal component analysis (PCA) to reduce the potential collinearity  
405 of the climate variables. The first two axes (ClimatePCA1, ClimatePCA2) explained  
406 94% (80% + 14%) of total variation in climatic variables (Table S4; Fig. S2).  
407 ClimatePCA1 was positively associated with MAP, MAP, PET and SD of MAP and  
408 PET, and negatively associated with SD of MAT. ClimatePCA2 was negatively related  
409 to SD of MAP, and positively related to SD of PET. Similarly, we used PCA to reduce  
410 the dimensionality of soil nutrient data. The first two PCA axes (SoilPCA1 and  
411 SoilPCA2) explained 87% (70% + 17%) of total variation in soil nutrients. SoilPCA1  
412 was negatively associated with SOC, TN, pH and AP, whereas SoilPCA2 was  
413 positively and negatively associated with pH and SOC, respectively (Table S4, Fig. S2).  
414 As the first principal component for both climate and soil nutrients explained a  
415 considerable amount of variation, we used the first principal component axis of both  
416 soil nutrients and climate in the following statistical analyses.

417

#### 418 **Statistical analyses**

419 Stability and species stability were log<sub>10</sub>-transformed and species asynchrony was  
420 angular transformed (arcsine(square-root(asynchrony))) to meet normality assumptions  
421 prior to analysis. First, to test for variation in stability and stabilizing mechanism  
422 (species stability and asynchrony) across a latitudinal gradient at both spatial grains, we  
423 used linear mixed-effect models with study site as a random intercept at both small and  
424 large grains, respectively. Second, to test if there was a variation at spatial grains in  
425 bivariate relationships between species richness, species stability, species asynchrony,  
426 and stability, we used mixed-effect models with study site as the random effect.

427 Confidence intervals (95%) of mixed effect models were computed using the  
428 “ggeffects” package<sup>53</sup>. Diagnostic plots were used to confirm model assumptions,  
429 including the homogeneity and normality of model residuals.

430 To explore the mechanisms shaping stability patterns across the latitudinal gradient at  
431 the small spatial grain, we fitted piecewise structural equation models (SEM) across  
432 and within study sites<sup>54</sup>. We constructed a hypothetical model based on current theory  
433 that we subsequently tested (Fig. S3, Table S5, ref.<sup>14,15,36,38</sup>). This model contains direct  
434 paths from functional trait composition ( $CWM_{SLA}$ ), species stability, species richness,  
435 species asynchrony, and stem density to stability to assess biotic stabilizing  
436 mechanisms, and we included direct paths from soil nutrients (SoilPCA1) and latitude  
437 to stability to evaluate abiotic stabilizing mechanisms. We also included paths between  
438 biotic mechanisms and between biotic and abiotic mechanisms to represent their  
439 indirect effects on stability (Fig. S3, Table S5). We used climate (ClimatePCA1) instead  
440 of latitude in an alternative model to test the specific effects of climate on stability (Fig.  
441 S4). For the across-plot SEM, we used mixed-effect models with study site as the  
442 random effect, and for within study site SEMs, we used generalized least square models.  
443 Due to spatial autocorrelation in the response variable (i.e., stability) within study sites  
444 (Moran’s I test<sup>55</sup>,  $P$ -value  $< 0.05$ , Table S6), we constructed several variogram models  
445 (Exponential, Gaussian spherical, Linear, Rational, Quadratics) to determine the most  
446 parsimonious spatial correlation structure. Models with a Gaussian spherical spatial  
447 correlation structure had the lowest AIC, and were subsequently used in both across-  
448 and within- study site SEMs. For those study sites without strong spatial autocorrelation  
449 (LS and CBS), we used generalized least square models without spatial correlation  
450 structures in SEM models (Table S6). Directed separation tests were used to examine  
451 whether missing paths should be added; we added non-hypothesized, statistically  
452 significant path coefficients ( $P < 0.05$ ) to improve model fit. We also removed paths  
453 that were not statistically significant to improve model fit. Akaike information criterion  
454 (AICc) and Fisher’s C statistic ( $P > 0.05$ ) were used to estimate the goodness-of-fit of  
455 model<sup>56</sup>.

456 To compare the relative importance of the effects of species stability and asynchrony  
457 on stability across the latitudinal gradient, we extracted path coefficients from both  
458 species stability and asynchrony to stability for each within-plot SEM. We then used a



459 linear model to test whether there is a trade-off in the relative importance of stabilizing  
460 mechanisms. Moreover, we also used linear model with path coefficients of species  
461 asynchrony and species stability to stability, and their ratio (i.e. asynchrony/species  
462 stability) as response variables, and latitude as predictor to test whether this trade-off  
463 follow a latitudinal pattern.

464 All statistical analyses were performed using R v.4.0.3<sup>57</sup>. Moran's I test and SEM  
465 analysis were performed using the “spdpe”<sup>55</sup> and “piecewiseSEM” packages<sup>54</sup>  
466 respectively, and mixed effects and generalized least squares models were used in the  
467 “nlme” package<sup>58</sup>.

468  
469

## References

- 470 1. Wilcox, K. R. *et al.* Asynchrony among local communities stabilises ecosystem  
471 function of metacommunities. *Ecology letters* **20**, 1534–1545 (2017).
- 472 2. Bai, Y., Han, X., Wu, J., Chen, Z. & Li, L. Ecosystem stability and  
473 compensatory effects in the Inner Mongolia grassland. *Nature* **431**, 181–184 (2004).
- 474 3. Hautier, Y. *et al.* Eutrophication weakens stabilizing effects of diversity in  
475 natural grasslands. *Nature* **508**, 521–525 (2014).
- 476 4. van der Plas, F. Biodiversity and ecosystem functioning in naturally assembled  
477 communities. *Biological Reviews* **94**, 1220–1245 (2019).
- 478 5. Thibaut, L. M. & Connolly, S. R. Understanding diversity–stability  
479 relationships: towards a unified model of portfolio effects. *Ecology letters* **16**, 140–150  
480 (2013).
- 481 6. Loreau, M. & de Mazancourt, C. Species synchrony and its drivers: neutral and  
482 nonneutral community dynamics in fluctuating environments. *The American Naturalist*  
483 **172**, E48–E66 (2008).
- 484 7. Loreau, M. & De Mazancourt, C. Biodiversity and ecosystem stability: a  
485 synthesis of underlying mechanisms. *Ecology letters* **16**, 106–115 (2013).
- 486 8. Hector, A. *et al.* General stabilizing effects of plant diversity on grassland  
487 productivity through population asynchrony and overyielding. *Ecology* **91**, 2213–2220  
488 (2010).
- 489 9. Roscher, C. *et al.* Identifying population- and community-level mechanisms of  
490 diversity–stability relationships in experimental grasslands. *Journal of Ecology* **99**,  
491 1460–1469 (2011).
- 492 10. Wayne Polley, H., Wilsey, B. J. & Derner, J. D. Dominant species constrain  
493 effects of species diversity on temporal variability in biomass production of tallgrass  
494 prairie. *Oikos* **116**, 2044–2052 (2007).
- 495 11. Wu, A. *et al.* Tree diversity depending on environmental gradients promotes  
496 biomass stability via species asynchrony in China's forest ecosystems. *Ecological*  
497 *Indicators* **140**, 109021 (2022).
- 498 12. Jucker, T., Bouriaud, O., Avacaritei, D. & Coomes, D. A. Stabilizing effects of  
499 diversity on aboveground wood production in forest ecosystems: linking patterns and  
500 processes. *Ecology Letters* **17**, 1560–1569 (2014).
- 501 13. Dolezal, J. *et al.* Determinants of ecosystem stability in a diverse temperate  
502 forest. *Oikos* **129**, 1692–1703 (2020).

- 503 14. Ouyang, S. *et al.* Stability in subtropical forests: The role of tree species  
504 diversity, stand structure, environmental and socio-economic conditions. *Global*  
505 *Ecology and Biogeography* **30**, 500–513 (2021).
- 506 15. Schnabel, F. *et al.* Species richness stabilizes productivity via asynchrony and  
507 drought-tolerance diversity in a large-scale tree biodiversity experiment. *Science*  
508 *advances* **7**, eabk1643 (2021).
- 509 16. Gonzalez, A. *et al.* Scaling-up biodiversity-ecosystem functioning research.  
510 *Ecology Letters* **23**, 757–776 (2020).
- 511 17. Ritchie, M. E. & Olf, H. Spatial scaling laws yield a synthetic theory of  
512 biodiversity. *Nature* **400**, 557–560 (1999).
- 513 18. Chisholm, R. A. *et al.* Scale-dependent relationships between tree species  
514 richness and ecosystem function in forests. *Journal of Ecology* **101**, 1214–1224 (2013).
- 515 19. Ruiz-Benito, P. *et al.* Diversity increases carbon storage and tree productivity  
516 in Spanish forests. *Global Ecology and Biogeography* **23**, 311–322 (2014).
- 517 20. Wang, S. & Loreau, M. Ecosystem stability in space:  $\alpha$ ,  $\beta$  and  $\gamma$  variability.  
518 *Ecology letters* **17**, 891–901 (2014).
- 519 21. Burley, H. M. *et al.* Primary productivity is weakly related to floristic alpha and  
520 beta diversity across Australia. *Global Ecology and Biogeography* **25**, 1294–1307  
521 (2016).
- 522 22. Burley, H. M. *et al.* Macroecological scale effects of biodiversity on ecosystem  
523 functions under environmental change. *Ecology and Evolution* **6**, 2579–2593 (2016).
- 524 23. Chalcraft, D. R. Changes in ecological stability across realistic biodiversity  
525 gradients depend on spatial scale. *Global Ecology and Biogeography* **22**, 19–28 (2013).
- 526 24. Gaston, K. J. Global patterns in biodiversity. *Nature* **405**, 220–227 (2000).
- 527 25. Ulrich, W., Kusumoto, B., Shiono, T. & Kubota, Y. Climatic and geographic  
528 correlates of global forest tree species–abundance distributions and community  
529 evenness. *Journal of vegetation science* **27**, 295–305 (2016).
- 530 26. Fotis, A. T. *et al.* Above-ground biomass is driven by mass-ratio effects and  
531 stand structural attributes in a temperate deciduous forest. *Journal of Ecology* **106**, 561–  
532 570 (2018).
- 533 27. Yuan, Z. *et al.* Few large trees, rather than plant diversity and composition, drive  
534 the above-ground biomass stock and dynamics of temperate forests in northeast China.  
535 *Forest Ecology and Management* **481**, 118698 (2021).
- 536 28. Valencia, E. *et al.* Synchrony matters more than species richness in plant  
537 community stability at a global scale. *Proceedings of the National Academy of Sciences*  
538 **117**, 24345–24351 (2020).
- 539 29. Chen, L. *et al.* Above-and belowground biodiversity jointly drive ecosystem  
540 stability in natural alpine grasslands on the Tibetan Plateau. *Global Ecology and*  
541 *Biogeography* **30**, 1418–1429 (2021).
- 542 30. García-Palacios, P., Gross, N., Gaitán, J. & Maestre, F. T. Climate mediates the  
543 biodiversity–ecosystem stability relationship globally. *Proceedings of the National*  
544 *Academy of Sciences* **115**, 8400–8405 (2018).
- 545 31. Fei, S. *et al.* Impacts of climate on the biodiversity-productivity relationship in  
546 natural forests. *Nature communications* **9**, 1–7 (2018).
- 547 32. Ordoñez, J. C. *et al.* A global study of relationships between leaf traits, climate  
548 and soil measures of nutrient fertility. *Global Ecology and Biogeography* **18**, 137–149  
549 (2009).
- 550 33. Grime, J. Benefits of plant diversity to ecosystems: immediate, filter and  
551 founder effects. *Journal of Ecology* **86**, 902–910 (1998).
- 552 34. Polley, H. W., Isbell, F. I. & Wilsey, B. J. Plant functional traits improve

- 553 diversity-based predictions of temporal stability of grassland productivity. *Oikos* **122**,  
554 1275–1282 (2013).
- 555 35. Poorter, L. *et al.* Biodiversity and climate determine the functioning of  
556 Neotropical forests. *Global ecology and biogeography* **26**, 1423–1434 (2017).
- 557 36. Craven, D. *et al.* Multiple facets of biodiversity drive the diversity–stability  
558 relationship. *Nature ecology & evolution* **2**, 1579–1587 (2018).
- 559 37. Del Río, M. *et al.* Species interactions increase the temporal stability of  
560 community productivity in *Pinus sylvestris*–*Fagus sylvatica* mixtures across Europe.  
561 *Journal of Ecology* **105**, 1032–1043 (2017).
- 562 38. Ma, Z. *et al.* Climate warming reduces the temporal stability of plant community  
563 biomass production. *Nature Communications* **8**, 1–7 (2017).
- 564 39. Liang, J. *et al.* Co-limitation towards lower latitudes shapes global forest  
565 diversity gradients. *Nature ecology & evolution* **6**, 1423–1437 (2022).
- 566 40. Houlihan, J. *et al.* Negative relationships between species richness and  
567 temporal variability are common but weak in natural systems. *Ecology* **99**, 2592–2604  
568 (2018).
- 569 41. Sasaki, T., Lu, X., Hirota, M. & Bai, Y. Species asynchrony and response  
570 diversity determine multifunctional stability of natural grasslands. *Journal of Ecology*  
571 **107**, 1862–1875 (2019).
- 572 42. Morin, X., Fahse, L., De Mazancourt, C., Scherer-Lorenzen, M. & Bugmann,  
573 H. Temporal stability in forest productivity increases with tree diversity due to  
574 asynchrony in species dynamics. *Ecology letters* **17**, 1526–1535 (2014).
- 575 43. Reich, P. B., Walters, M. B. & Ellsworth, D. S. From tropics to tundra: global  
576 convergence in plant functioning. *Proceedings of the National Academy of Sciences* **94**,  
577 13730–13734 (1997).
- 578 44. Xu, Q. *et al.* Consistently positive effect of species diversity on ecosystem, but  
579 not population, temporal stability. *Ecology Letters* **24**, 2256–2266 (2021).
- 580 45. Hautier, Y. & Van der Plas, F. Biodiversity and Temporal Stability of Naturally  
581 Assembled Ecosystems Across Spatial Scales in a Changing World. *The Ecological  
582 and Societal Consequences of Biodiversity Loss* 189–209 (2022).
- 583 46. Doak, D. F. *et al.* The statistical inevitability of stability–diversity relationships  
584 in community ecology. *The American Naturalist* **151**, 264–276 (1998).
- 585 47. Liang, M. *et al.* Consistent stabilizing effects of plant diversity across spatial  
586 scales and climatic gradients. *Nature Ecology & Evolution* **6**, 1669–1675 (2022).
- 587 48. Craven, D. *et al.* A cross-scale assessment of productivity–diversity  
588 relationships. *Global Ecology and Biogeography* **29**, 1940–1955 (2020).
- 589 49. Grman, E., Lau, J. A., Schoolmaster Jr, D. R. & Gross, K. L. Mechanisms  
590 contributing to stability in ecosystem function depend on the environmental context.  
591 *Ecology letters* **13**, 1400–1410 (2010).
- 592 50. Condit, R. *Tropical forest census plots: methods and results from Barro  
593 Colorado Island, Panama and a comparison with other plots.* (Springer Science &  
594 Business Media, 1998).
- 595 51. Díaz, S. *et al.* The global spectrum of plant form and function. *Nature* **529**, 167–  
596 171 (2016).
- 597 52. Tilman, D. The ecological consequences of changes in biodiversity: a search for  
598 general principles. *Ecology* **80**, 1455–1474 (1999).
- 599 53. Lüdtke, D. ggeffects: Tidy data frames of marginal effects from regression  
600 models. *Journal of Open Source Software* **3**, 772 (2018).
- 601 54. Lefcheck, J. S. piecewiseSEM: Piecewise structural equation modelling in r for  
602 ecology, evolution, and systematics. *Methods in Ecology and Evolution* **7**, 573–579

- 603 (2016).  
604 55. Bivand, R. *et al.* Package ‘spdep’. *The Comprehensive R Archive Network*  
605 (2015).  
606 56. Shipley, B. Confirmatory path analysis in a generalized multilevel context.  
607 *Ecology* **90**, 363–368 (2009).  
608 57. Team, R. C. & others. R: A language and environment for statistical computing.  
609 (2013).  
610 58. Pinheiro, J., Bates, D., DebRoy, S., Sarkar, D. & Team, R. C. Linear and  
611 nonlinear mixed effects models. *R package version 3*, 1–89 (2007).  
612

### 613 **Acknowledgments:**

614 We thank the Chinese Forest Biodiversity Monitoring Network (CForBio) for  
615 providing the data. We also thank all field technicians and students who have  
616 participated in forest inventories at all plots. This work was financially supported by  
617 the Strategic Priority Research Program of Chinese Academy of Sciences  
618 (XDB31000000), National Natural Science Foundation of China (32171536,  
619 32061123003 and 31670441). Nathaly R. Guerrero-Ramírez thanks the Dorothea  
620 Schlözer Postdoctoral Programme of the Georg-August-Universität for their support,  
621 and Dylan Craven acknowledges funding from FONDECYT Project 1201347.

622

### 623 **Authors’ Contributions:**

624 X.J.Q. and M.X.J. designed the research; T.Y.Z., N.R.G.-R., D.C. and X.J.Q. conceived  
625 ideas; T.Y.Z., compiled and analyzed the data with the help of N.R.G.-R., D.C., H.K.  
626 and X.J.Q.; T.Y.Z., N.R.G.-R., D.C., H.K. and X.J.Q. led the writing of the manuscript.  
627 All authors revised the drafts and gave final approval for publication.

628

### 629 **Competing interests**

630 The authors declare no competing interests.
